# Supplementary material
Source: HighWire-hosted journal article supplement (https://hw-f5-jim.highwire.org/content/69/6/1156)
Supplement: inline-supplementary-material-1 [file inline-supplementary-material-1.pdf]

**Supplemental Table 1 Primer sequences in RT-PCR**

| Gene          | Upstream primer (5'-3') | Downstream primer (5'-3') | Fragment length bp | Annealing temperature °C |
|---------------|-------------------------|---------------------------|--------------------|--------------------------|
| p-p38<br>MAPK | AGGCTCAACATCTAGGCT      | TAGTTTATGGGCGCCCTATAC     | 234                | 58                       |
| p-JNK1/2      | TGATGGGCCCATCATAAAT     | ATAGTACGACCCTAGCTGAT      | 211                | 58                       |
| Cyt C         | GCTAGTTGGGGAATTTCGCGT   | GTCATGGTAGTAGATGAGGCC     | 255                | 58                       |
| Caspase-3     | TTAAACCCCTCCTAGTCTAA    | GATATTAATAGGGCCTAAA       | 234                | 58                       |
| β-actin       | GTTATTGCCGCGTCTCTATC    | AATTTTGGGCGCCCAATATAA     | 217                | 58                       |

**Supplemental Table 2 Mitochondrial targeting agents reduce macrophage recruitment**

| Group                               | F4/80 positive area (%) |
|-------------------------------------|-------------------------|
| Control                             | 0.27±0.12               |
| Atherosclerosis group               | 8.33±0.45               |
| Mitochondrial targeting agent group | 3.24±0.18               |
| <i>F</i> value                      | 13.264                  |
| <i>P</i> value                      | 0.016                   |

**Supplemental Table 3 Mitochondrial targeting agents reduce the expression of proinflammatory cytokines**

| Group                               | TNF-α     | IL-6      | NLRP3     | ICAM1     |
|-------------------------------------|-----------|-----------|-----------|-----------|
| Control                             | 1.33±0.14 | 0.85±0.21 | 1.33±0.14 | 0.75±0.28 |
| Atherosclerosis group               | 4.87±0.25 | 6.48±0.16 | 5.34±0.25 | 4.78±0.36 |
| Mitochondrial targeting agent group | 2.34±0.32 | 2.56±0.23 | 2.73±0.18 | 1.85±0.21 |
| <i>F</i> value                      | 13.547    | 12.354    | 13.241    | 13.294    |
| <i>P</i> value                      | 0.014     | 0.001     | 0.013     | 0.007     |

**Supplemental Table 4 Mitochondrial targeting agents inhibit the expression of phosphor-p38 MAPK and JNK1/2**

| Group                               | p-p38 MAPK | p-JNK1/2  |
|-------------------------------------|------------|-----------|
| Control                             | 1.83±0.24  | 1.15±0.14 |
| Atherosclerosis group               | 8.83±0.18  | 6.33±0.25 |
| Mitochondrial targeting agent group | 3.55±0.21  | 3.17±0.24 |
| <i>F</i> value                      | 12.324     | 14.523    |
| <i>P</i> value                      | 0.013      | 0.016     |

**Supplemental Table 5 Mitochondrial targeting agents inhibit MAPK/JNK mRNA expression**

| Group                               | p-p38 MAPK | p-JNK1/2  |
|-------------------------------------|------------|-----------|
| Control                             | 1.55±0.13  | 0.78±0.12 |
| Atherosclerosis group               | 6.47±0.16  | 4.55±0.16 |
| Mitochondrial targeting agent group | 3.24±0.18  | 1.85±0.13 |
| <i>F</i> value                      | 13.254     | 16.864    |
| <i>P</i> value                      | 0.014      | 0.013     |

**Supplemental Table 6 Cyt C and caspase-3 expression**

| Group                               | Cyt C     | Caspase-3 |
|-------------------------------------|-----------|-----------|
| Control                             | 1.04±0.13 | 0.15±0.11 |
| Atherosclerosis group               | 3.57±0.26 | 1.34±0.17 |
| Mitochondrial targeting agent group | 1.47±0.18 | 0.52±0.14 |
| <i>F</i> value                      | 12.327    | 14.327    |
| <i>P</i> value                      | 0.013     | 0.008     |
